# Supplementary material
Source: PubMed Central journal article supplement (PMC4610855)
Supplement: NIHMS718108-supplement-1.pdf [file NIHMS718108-supplement-1.pdf]

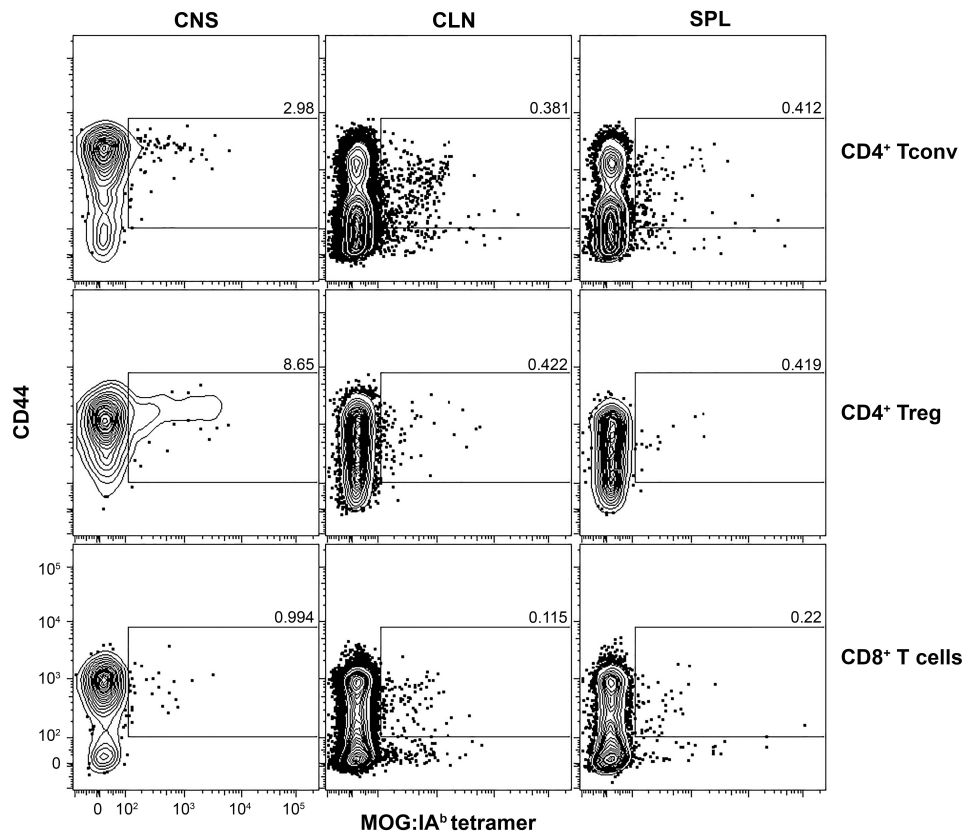

**Supplemental Figure 1.** Representative FACS plots showing the staining of MOG:IA<sup>b</sup> tetramers and CD44 for indicated cell types for the indicated organs isolated from mice at peak of EAE. The tetramer positive gates were drawn using the CD8<sup>+</sup> T cells as a negative control. Indicated cell types were gated as follows: CD4<sup>+</sup> Tconv (DumpCD4<sup>+</sup>Foxp3-GFP<sup>-</sup>), CD4<sup>+</sup> Tregs (DumpCD4<sup>+</sup>Foxp3-GFP<sup>+</sup>), and CD8<sup>+</sup> T cells (DumpCD8<sup>+</sup>). Dump consisted of CD11b, CD11c, and CD19.

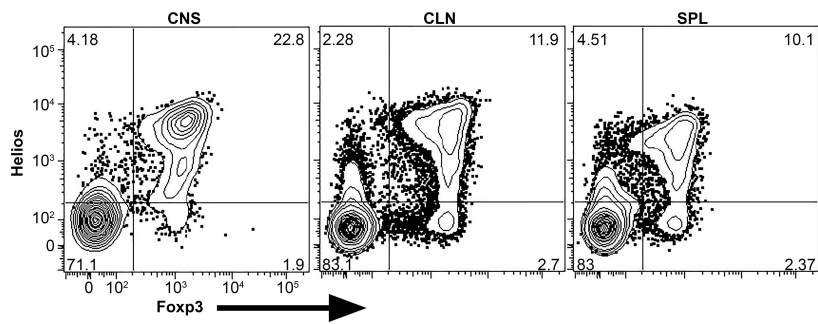

**Supplemental Figure 2.** Representative FACS plots showing the expression of Foxp3 and Helios for CD4<sup>+</sup> Dump<sup>-</sup> cells for the indicated organs isolated from mice at peak of EAE. Dump channel was made of CD11b, CD11c, and CD19.

Supplemental Table I. Two-sided Fisher's Exact p-values for the data presented in Figure 5.

|       | Naïve Tconv vs. Naïve Treg | d21 CNS Tconv vs. d21 CNS Treg |
|-------|----------------------------|--------------------------------|
| Foxp3 | 3.73E-100                  | 6.41E-08                       |
| Gitr  | 8.57E-27                   | 2.20E-41                       |
| Ctla4 | 7.70E-37                   | 3.44E-27                       |
| Eos   | 6.52E-12                   | 0.000163                       |
| CD25  | 1.61E-32                   | 0.006423                       |
